# Supplementary material for: A framework to evaluate and elucidate the driving mechanisms of coastal sea surface p CO 2 seasonality using an ocean general circulation model (MOM6-COBALT)
Source: Copernicus journal article supplement (doi:10.5194/os-18-67-2022), 2022-01-10
Supplement: Supplementary file 1 [file EGU_Roobaert_OS_supporting_Information_Modified_revisedv4_2.pdf › EGU_Roobaert_OS_supporting_Information_Modified_revisedv4_2.pdf]

Sensitivity coefficients widely used for the decomposition of seas surface pCO<sub>2</sub> in the open ocean (Sarmiento and Gruber, 2006; Takahashi et al., 1993) :

$$\frac{\partial pCO_2}{\partial DIC} = \frac{\overline{pCO_2}}{\overline{DIC}} \frac{3 \times \overline{ALK} \times \overline{DIC} - 2 \times \overline{DIC}^2}{(2 \times \overline{DIC} - \overline{ALK})(\overline{ALK} - \overline{DIC})} \quad (S1)$$

$$5 \quad \frac{\partial pCO_2}{\partial ALK} = - \frac{\overline{pCO_2}}{\overline{ALK}} \frac{\overline{ALK}^2}{(2 \times \overline{DIC} - \overline{ALK})(\overline{ALK} - \overline{DIC})} \quad (S2)$$

$$\frac{\partial pCO_2}{\partial SST} = \overline{pCO_2} \times 0.0423 \quad (S3)$$

$$\frac{\partial pCO_2}{\partial SSS} = \frac{\overline{pCO_2}}{\overline{SSS}} \quad (S4)$$

, where the overbar represents the long-term mean value in the period of 1998-2015 at each point in space.

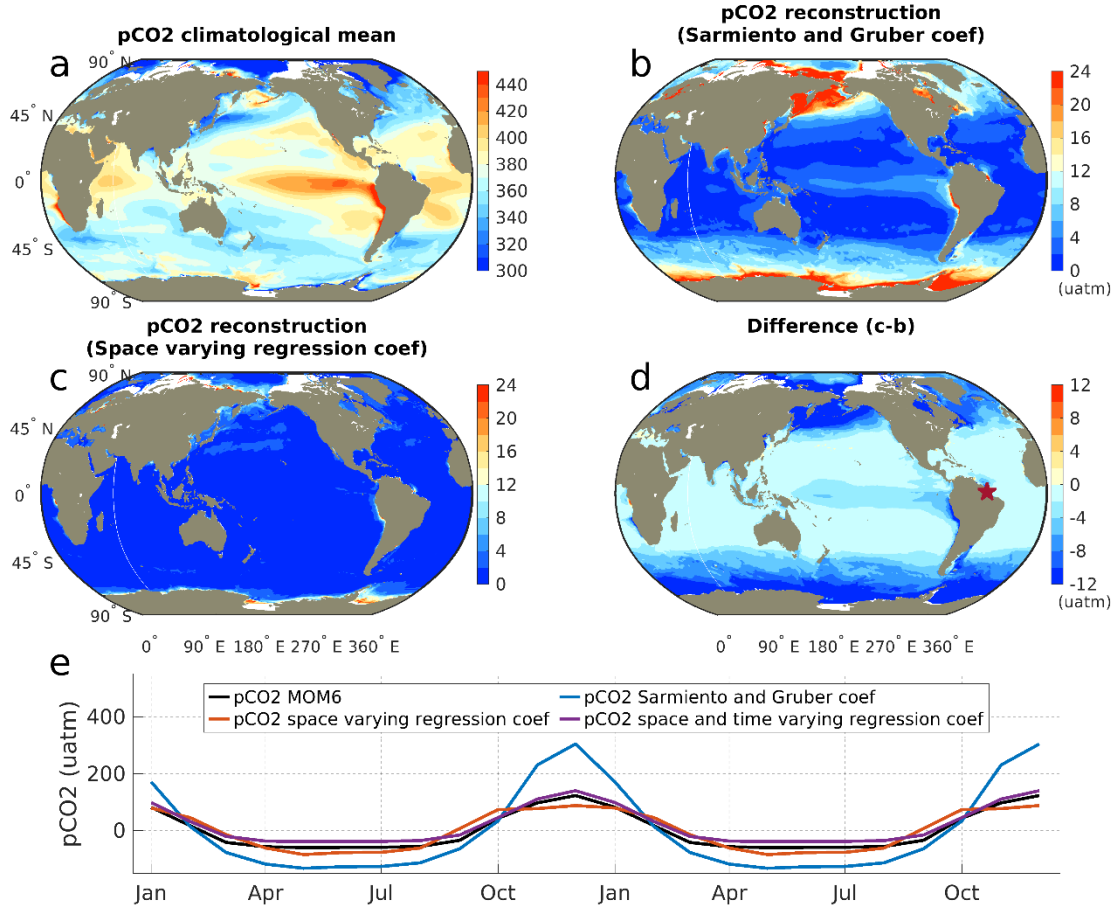

**Figure S1: Evaluation of ocean pCO<sub>2</sub> reconstruction methods using the same SST, SSS, DIC and ALK fields but different methods to derive the pCO<sub>2</sub> sensitivity coefficients ( $\frac{\partial pCO_2}{\partial DIC}$ ,  $\frac{\partial pCO_2}{\partial ALK}$ ,  $\frac{\partial pCO_2}{\partial SST}$  and  $\frac{\partial pCO_2}{\partial SSS}$ ):** (a) ocean pCO<sub>2</sub> simulated by MOM6-COBALT, (b) bias in reconstructed pCO<sub>2</sub> using the approach widely used in the open ocean to compute sensitivity coefficients (Sarmiento and Gruber, 2006; Takahashi et al., 1993) and (c) bias in reconstructed pCO<sub>2</sub> using the regression-based approach developed in this study to compute space varying sensitivity coefficients (using the CO2SYS program, see section 2.3 for details). (d) The difference in bias between the traditional and regression-based approaches shows a strong reduction in biases when using the regression-based method. Biases (in μatm) are quantified using the root mean square error (RMSE) between the pCO<sub>2</sub> simulated by the model and the pCO<sub>2</sub> reconstructed from simulated monthly SST, DIC, ALK and SSS (Eq. 2). (e) time series of seasonal pCO<sub>2</sub> anomaly at 310.25°E, 1°N (star on panel d) simulated by the MOM6 model (black), and reconstructed using the space varying coefficients of Sarmiento and Gruber 2006 (blue), using the space varying regression-based coefficients used in this study (red), and space and time varying regression-based coefficients (purple). See text in method section for further details.

30

**Table S1: Spatial annual mean evaluation of MOM6-COBALT against observational data (SST, SSS, nutrients and pCO<sub>2</sub>) for each MARCATS. A positive bias indicates higher values simulated by MOM6-COBALT. The observational SST and SSS fields are from the NOAA OI SST V2 (Reynolds et al., 2007) and the EN4 SSS (Good et al., 2013). The observational nutrients derived from the World Ocean Atlas version 2018 (Garcia et al., 2019). The bias between the pCO<sub>2</sub> simulated by MOM6-COBALT is also evaluated against SOCATv6 and the coastal-SOM-FFN. Absolute pCO<sub>2</sub> biases larger than 20 µatm are highlighted in red. Blank cells values represent regions for which no observation are available in the SOCATv6 database. The percentage of the MARCATS surface covered by SOCATv6 observations is also presented.**

| MARCATS<br>number (Mx) | MARCATS<br>name            | MARCATS category | Evaluation against data (bias) |         |                                    |                 |                  |                               |                                      | Evaluation<br>against<br>Coastal-<br>SOM-FFN<br>(bias) | Surface<br>covered<br>by<br>SOCATv<br>6 (%) |
|------------------------|----------------------------|------------------|--------------------------------|---------|------------------------------------|-----------------|------------------|-------------------------------|--------------------------------------|--------------------------------------------------------|---------------------------------------------|
|                        |                            |                  | SST (°C)                       | SSS (-) | Nutrients (μmol kg <sup>-1</sup> ) |                 |                  | pCO <sub>2</sub> (μatm)       |                                      | pCO <sub>2</sub> (μatm)                                |                                             |
|                        |                            |                  |                                |         | NO <sub>3</sub>                    | PO <sub>4</sub> | SiO <sub>4</sub> | MOM6-<br>COBALT<br>vs SOCATv6 | Coastal-<br>SOM-FFN<br>vs<br>SOCATv6 |                                                        |                                             |
|                        |                            |                  |                                |         |                                    |                 |                  |                               |                                      |                                                        |                                             |
| 2                      | Californian Current        | EBC              | 0.2                            | 0.0     | 0.3                                | -0.2            | 2.5              | 20.7                          | -12.7                                | 34.5                                                   | 64                                          |
| 4                      | Peruvian upwelling Current | EBC              | -0.2                           | -0.1    | 8.1                                | 0.2             | 0.9              | 98.5                          | -17.7                                | 106.4                                                  | 18                                          |
| 19                     | Iberian upwelling          | EBC              | 0.4                            | 0.4     | -0.5                               | -0.1            | -0.2             | 5.8                           | -8.1                                 | 9.3                                                    | 72                                          |
| 22                     | Moroccan upwelling         | EBC              | 0.5                            | 0.2     | -0.5                               | -0.1            | -0.4             | 4.4                           | -7.1                                 | 10.2                                                   | 60                                          |
| 24                     | SW Africa                  | EBC              | 0.7                            | 0.1     | 2.5                                | 0.0             | -0.4             | 10.2                          | -2.7                                 | 79.3                                                   | 33                                          |
| 33                     | Leeuwin Current            | EBC              | -0.3                           | 0.2     | -0.2                               | -0.1            | 0.8              | 12.1                          | 5.6                                  | 4.2                                                    | 51                                          |
| 27                     | W Arabian Sea              | Indian margins   | 0.3                            | 0.4     | -1.6                               | -0.4            | -1.5             | 14.7                          | 5.7                                  | 11.6                                                   | 3                                           |
| 30                     | E Arabian Sea              | Indian margins   | -0.1                           | 0.4     | 0.0                                | -0.3            | -0.9             |                               |                                      | -8.3                                                   | 0                                           |
| 31                     | Bay of Bengal              | Indian margins   | 0.0                            | -0.6    | 3.4                                | -0.2            | -1.2             |                               |                                      | -24.1                                                  | 0                                           |
| 32                     | Tropical E Indian          | Indian margins   | 0.1                            | -0.1    | -0.1                               | -0.1            | -0.5             | -7.7                          | -7.1                                 | 0.3                                                    | 8                                           |
| 9                      | Gulf of Mexico             | Marginal sea     | 0.4                            | 0.3     | 0.6                                | -0.2            | -0.4             | -2.0                          | 3.8                                  | -9.1                                                   | 68                                          |
| 12                     | Hudson Bay                 | Marginal sea     | -0.4                           | 0.7     | -1.2                               | -0.4            | 2.9              |                               |                                      | 5.7                                                    | 0                                           |
| 18                     | Baltic Sea                 | Marginal sea     | -0.5                           | -5.8    | 2.5                                | 1.5             | -11.0            | 15.7                          | -5.1                                 | 21.4                                                   | 51                                          |
| 20                     | Mediterranean Sea          | Marginal sea     | -0.1                           | -1.4    | 0.1                                | 0.0             | 1.4              | -4.2                          | -1.5                                 | -11.9                                                  | 33                                          |
| 21                     | Black Sea                  | Marginal sea     | -0.2                           | 7.6     | 3.0                                | 3.4             | 74.5             |                               |                                      | 25.2                                                   | 0                                           |
| 28                     | Red Sea                    | Marginal sea     | -0.2                           | -1.0    | 0.0                                | -0.2            | 0.9              | 13.6                          | 0.2                                  | -16.5                                                  | 15                                          |
| 29                     | Persian Gulf               | Marginal sea     | -0.8                           | 4.4     | 1.0                                | -0.2            | 1.3              |                               |                                      | -7.6                                                   | 0                                           |

|    |                        |              |      |      |      |      |      |       |       |       |    |
|----|------------------------|--------------|------|------|------|------|------|-------|-------|-------|----|
| 40 | Sea of Japan           | Marginal sea | 0.1  | -0.1 | 0.0  | -0.2 | -6.2 | 24.9  | 17.2  | -9.3  | 28 |
| 41 | Sea of Okhotsk         | Marginal sea | -0.6 | 0.3  | 4.0  | 0.2  | 11.5 | -22.0 | -26.5 | 29.2  | 3  |
| 13 | Canadian Archipelago   | Polar        | -0.5 | 2.5  | 1.1  | -0.3 | 1.0  | 9.2   | 15.8  | -53.1 | 12 |
| 14 | N Greenland            | Polar        | -0.5 | 0.5  | -0.5 | -0.4 | -2.4 | -12.3 | -10.0 | -24.3 | 18 |
| 15 | S Greenland            | Polar        | 1.0  | 0.2  | -0.7 | -0.2 | -0.9 | 6.6   | 0.0   | 1.3   | 47 |
| 16 | Norwegian Basin        | Polar        | -0.5 | 0.1  | -1.4 | -0.2 | -1.0 | 3.9   | 0.5   | -0.7  | 77 |
| 43 | Siberian Shelves       | Polar        | -0.1 | 1.2  | 1.8  | -0.1 | -0.2 | 14.7  | 21.6  | -19.7 | 5  |
| 44 | Barents and Kara seas  | Polar        | -0.5 | -1.0 | 0.2  | -0.1 | -3.9 | 13.2  | -0.9  | -3.3  | 14 |
| 45 | Antarctic Shelves      | Polar        | 0.0  | -0.2 | 0.0  | 0.0  | -4.9 | -25.8 | -3.0  | -17.6 | 39 |
| 1  | N-E Pacific            | Subpolar     | -0.1 | 0.2  | -1.6 | -0.5 | -4.2 | -5.2  | -24.9 | 16.8  | 61 |
| 5  | Southern America       | Subpolar     | -0.1 | 0.0  | -1.0 | -0.1 | 5.3  | 7.9   | 1.3   | 14.0  | 49 |
| 11 | Sea of Labrador        | Subpolar     | 0.2  | 0.8  | 0.7  | -0.2 | 0.6  | 7.6   | -5.2  | 5.5   | 20 |
| 17 | NE Atlantic            | Subpolar     | 0.0  | -0.1 | -0.4 | -0.1 | 0.0  | -5.2  | -3.1  | -4.5  | 80 |
| 34 | S Australia            | Subpolar     | -0.4 | -0.2 | -0.2 | -0.1 | 0.0  | 5.2   | -5.7  | 13.5  | 28 |
| 36 | New Zealand            | Subpolar     | -0.2 | -0.5 | 0.8  | -0.1 | 0.9  | 13.7  | -0.6  | 6.1   | 38 |
| 42 | NW Pacific             | Subpolar     | -0.1 | 0.5  | 1.5  | -0.1 | 5.8  | 46.8  | -0.2  | 25.2  | 40 |
| 3  | Tropical E Pacific     | Tropical     | -0.1 | 0.1  | -0.8 | -0.3 | -0.9 | 7.9   | -5.8  | 17.2  | 53 |
| 7  | Tropical W Atlantic    | Tropical     | 0.1  | -2.0 | 1.4  | -0.2 | -2.1 | 11.4  | -1.9  | -19.8 | 20 |
| 8  | Caribbean Sea          | Tropical     | 0.0  | 0.3  | -0.3 | -0.1 | -1.9 | 3.2   | -2.8  | -1.7  | 42 |
| 23 | Tropical E Atlantic    | Tropical     | 0.3  | -0.1 | 0.3  | -0.1 | -1.4 | 27.8  | 6.5   | 15.9  | 12 |
| 26 | Tropical W Indian      | Tropical     | -0.1 | 0.4  | -0.1 | -0.2 | -0.6 | 1.0   | -20.0 | 4.8   | 4  |
| 37 | N Australia            | Tropical     | 0.1  | -0.2 | 0.0  | -0.2 | 0.7  | 7.0   | 6.0   | -4.0  | 11 |
| 38 | SE Asia                | Tropical     | 0.3  | -0.8 | 0.6  | -0.2 | -2.9 | 0.1   | 10.9  | 0.6   | 5  |
| 6  | Brazilian Current      | WBC          | 0.2  | -0.6 | -0.6 | -0.2 | -1.6 | 10.9  | -1.3  | 7.0   | 48 |
| 10 | U.S. East Coast        | WBC          | 1.3  | 1.0  | 0.5  | -0.2 | 0.4  | -7.6  | -2.2  | -9.6  | 83 |
| 25 | Agulhas Current        | WBC          | 0.1  | 0.4  | -0.2 | -0.2 | -0.7 | 10.2  | 2.2   | 5.7   | 18 |
| 35 | E Australian Current   | WBC          | -0.6 | -0.3 | -0.4 | -0.2 | -0.2 | 10.0  | 6.1   | 2.9   | 48 |
| 39 | China Sea and Kuroshio | WBC          | 0.0  | -0.8 | 1.5  | -0.2 | -2.4 | 2.7   | 5.5   | -4.1  | 38 |

35 **Table S2: Seasonal evaluation of MOM6-COBALT against observations (SST, SSS, nutrients and pCO<sub>2</sub>) for each MARCATS. The**  
**observational SST and SSS fields are from the NOAA OI SST V2 (Reynolds et al., 2007) and the EN4 SSS (Good et al., 2013). The**  
**observational nutrients derived from the World Ocean Atlas version 2018 (Garcia et al., 2019).The evaluation is performed on their**  
**seasonal amplitude which is expressed as the bias between the RMS of their amplitude. A positive value indicates higher values simulated**  
**by MOM6-COBALT compared to observations. The seasonal evaluation is also performed on their seasonal cycles which is represented**  
40 **by the Pearson correlation coefficient. A Pearson correlation coefficient value of 1 indicates that both signals are perfectly in phase with**  
**one another while a value of -1 represents a complete phase shift. Pearson correlation coefficient < 0.5 for pCO<sub>2</sub> are highlighted in red. The**  
**seasonal pCO<sub>2</sub> simulated by MOM6-COBALT is evaluated against coastal-SOM-FFN and for some MARCATS against SOCATv6 (in**  
**bracket).**

| MARCATS<br>number (Mx) | MARCATS<br>name            | MARCATS<br>category | Evaluation against data |            |                                    |                 |                  |                                 |      |                 |                 |                  | Evaluation against<br>coastal-SOM-FFN<br>(SOCATv6) |                                       |
|------------------------|----------------------------|---------------------|-------------------------|------------|------------------------------------|-----------------|------------------|---------------------------------|------|-----------------|-----------------|------------------|----------------------------------------------------|---------------------------------------|
|                        |                            |                     | Bias RMS                |            |                                    |                 |                  | Pearson correlation coefficient |      |                 |                 |                  | Bias<br>RMS                                        | Pearson<br>correlation<br>coefficient |
|                        |                            |                     | SST<br>(°C)             | SSS<br>(-) | Nutrients (μmol kg <sup>-1</sup> ) |                 |                  | SST                             | SSS  | Nutrients       |                 |                  | pCO <sub>2</sub> (μatm)                            |                                       |
|                        |                            |                     |                         |            | NO <sub>3</sub>                    | PO <sub>4</sub> | SiO <sub>4</sub> |                                 |      | NO <sub>3</sub> | PO <sub>4</sub> | SiO <sub>4</sub> |                                                    |                                       |
| 2                      | Californian Current        | EBC                 | 0.0                     | 0.0        | -0.1                               | 0.0             | -0.4             | 1.0                             | -0.3 | -0.2            | 0.2             | -0.1             | 16.2<br>(17.6)                                     | 1.0 (0.9)                             |
| 4                      | Peruvian upwelling Current | EBC                 | 0.1                     | 0.0        | 0.0                                | 0.0             | -0.2             | 1.0                             | 0.8  | 0.7             | 0.7             | 0.8              | 6.6                                                | -0.4                                  |
| 19                     | Iberian upwelling          | EBC                 | -0.2                    | 0.0        | -0.8                               | 0.0             | -0.7             | 1.0                             | 0.7  | 1.0             | 0.9             | 0.6              | 15.6<br>(9.3)                                      | 0.8 (0.2)                             |
| 22                     | Moroccan upwelling         | EBC                 | -0.1                    | 0.0        | -0.3                               | 0.0             | -0.7             | 1.0                             | 0.8  | 0.6             | 0.6             | -0.1             | 8.7 (7.7)                                          | 0.9 (0.5)                             |
| 24                     | SW Africa                  | EBC                 | 0.1                     | 0.0        | -0.3                               | -0.1            | -0.9             | 1.0                             | 0.7  | 0.9             | 0.0             | -0.4             | 4.2                                                | 0.9                                   |
| 33                     | Leeuwin Current            | EBC                 | 0.0                     | 0.0        | -0.1                               | 0.0             | -0.1             | 1.0                             | 1.0  | 0.2             | 0.0             | 0.0              | 12.7                                               | 0.9                                   |
| 27                     | W Arabian Sea              | Indian margins      | -0.1                    | 0.0        | -1.0                               | -0.1            | -1.1             | 1.0                             | 0.7  | 0.9             | 0.8             | 0.5              | 3.6                                                | 0.3                                   |
| 30                     | E Arabian Sea              | Indian margins      | 0.0                     | -0.1       | 0.1                                | 0.0             | -0.9             | 1.0                             | 0.9  | 0.7             | 0.2             | 0.0              | 6.2                                                | 0.7                                   |
| 31                     | Bay of Bengal              | Indian margins      | 0.1                     | 0.5        | 2.0                                | -0.1            | -1.8             | 1.0                             | 0.9  | 0.5             | 0.7             | -0.1             | 13.5                                               | -0.2                                  |
| 32                     | Tropical E Indian          | Indian margins      | -0.1                    | 0.0        | -0.1                               | 0.0             | -0.9             | 1.0                             | 0.8  | -0.7            | 0.0             | -0.5             | 5.4                                                | 0.9                                   |
| 9                      | Gulf of Mexico             | Marginal sea        | -0.3                    | 0.0        | -0.4                               | -0.1            | -0.5             | 1.0                             | 0.6  | 0.1             | 0.1             | -0.7             | 12.9 (10)                                          | 1.0 (0.9)                             |
| 12                     | Hudson Bay                 | Marginal sea        | -0.2                    | 0.0        | 0.9                                | 0.0             | 0.9              | 1.0                             | 0.1  | 0.0             | -0.4            | 0.6              | -46.4                                              | 0.4                                   |
| 18                     | Baltic Sea                 | Marginal sea        | -0.5                    | -0.1       | -0.1                               | 0.0             | -2.0             | 1.0                             | 0.9  | 0.9             | 0.9             | 0.6              | -44.4                                              | 0.9                                   |
| 20                     | Mediterranean Sea          | Marginal sea        | -0.1                    | 0.0        | 0.1                                | 0.0             | -0.2             | 1.0                             | 0.6  | 0.7             | 0.5             | 0.0              | 20.6                                               | 1.0                                   |
| 21                     | Black Sea                  | Marginal sea        | -1.3                    | 0.1        | 3.1                                | 0.2             | 1.2              | 1.0                             | 0.9  | 0.6             | 0.6             | 0.5              | -116.9                                             | -0.5                                  |

|    |                       |              |      |      |      |      |      |     |      |      |      |      |              |            |
|----|-----------------------|--------------|------|------|------|------|------|-----|------|------|------|------|--------------|------------|
| 28 | Red Sea               | Marginal sea | 0.0  | -0.2 | -0.1 | 0.0  | -0.3 | 1.0 | 0.2  | 0.4  | 0.5  | -0.1 | -0.4         | -0.9       |
| 29 | Persian Gulf          | Marginal sea | -0.2 | 0.0  | 0.1  | 0.0  | -0.1 | 1.0 | 0.9  | 0.0  | 0.5  | 0.7  | 30.7         | -0.9       |
| 40 | Sea of Japan          | Marginal sea | -0.6 | 0.0  | -1.3 | -0.1 | -3.0 | 1.0 | 1.0  | 0.9  | 1.0  | 0.6  | 28.0         | 0.9        |
| 41 | Sea of Okhotsk        | Marginal sea | -0.4 | 0.1  | -1.1 | -0.1 | -6.2 | 1.0 | 0.9  | 1.0  | 0.9  | 1.0  | -6.5         | 0.7        |
| 13 | Canadian Archipelago  | Polar        | -0.4 | 0.0  | 0.6  | 0.0  | -0.9 | 1.0 | 0.8  | 0.9  | 0.7  | 0.9  | -18.0        | 0.9        |
| 14 | N Greenland           | Polar        | 0.2  | 0.1  | -0.3 | 0.0  | -0.6 | 1.0 | 0.8  | 1.0  | 0.9  | 0.8  | -9.0         | 0.8        |
| 15 | S Greenland           | Polar        | 0.1  | 0.0  | 0.1  | 0.0  | -1.0 | 1.0 | 0.6  | 1.0  | 1.0  | 0.9  | -8.5 (-8.8)  | 1.0 (1.0)  |
| 16 | Norwegian Basin       | Polar        | 0.0  | 0.0  | -0.5 | 0.0  | -0.4 | 1.0 | 0.9  | 1.0  | 1.0  | 0.9  | -6.1 (-4.1)  | 0.9 (0.7)  |
| 43 | Siberian Shelves      | Polar        | -0.4 | -0.4 | 0.9  | -0.1 | -4.0 | 1.0 | 0.6  | 0.5  | 0.4  | 0.6  | -15.7        | 0.9        |
| 44 | Barents and Kara seas | Polar        | -0.2 | -0.3 | 0.1  | 0.0  | -1.1 | 1.0 | 0.6  | 0.9  | 0.9  | 0.6  | -7.4         | 0.7        |
| 45 | Antarctic Shelves     | Polar        | 0.2  | 0.1  | 2.0  | 0.1  | 1.3  | 1.0 | 0.9  | 1.0  | 0.9  | 0.6  | 13.3         | 1.0        |
| 1  | N-E Pacific           | Subpolar     | -0.1 | -0.1 | -1.2 | -0.2 | -5.6 | 1.0 | 0.9  | 0.9  | 0.9  | 0.8  | -4.5         | 0.8        |
| 5  | Southern America      | Subpolar     | -0.1 | 0.0  | -1.4 | -0.1 | -0.3 | 1.0 | 0.9  | 0.9  | 0.9  | 0.7  | -6.4         | 0.8        |
| 11 | Sea of Labrador       | Subpolar     | -0.2 | -0.1 | 0.3  | 0.0  | -0.5 | 1.0 | 1.0  | 0.9  | 0.9  | 0.9  | 0.8          | 0.2        |
| 17 | NE Atlantic           | Subpolar     | 0.0  | 0.1  | -0.8 | 0.0  | -0.7 | 1.0 | 1.0  | 1.0  | 1.0  | 1.0  | -8.2 (-12.5) | 0.6 (0.6)  |
| 34 | S Australia           | Subpolar     | 0.2  | 0.0  | 0.3  | 0.0  | -0.2 | 1.0 | 0.6  | 0.9  | 0.7  | 0.2  | 12.8         | 0.9        |
| 36 | New Zealand           | Subpolar     | 0.0  | 0.0  | 0.4  | 0.0  | -0.3 | 1.0 | 0.7  | 0.8  | 0.8  | 0.6  | 6.2 (2.8)    | -0.5 (0.3) |
| 42 | NW Pacific            | Subpolar     | -0.2 | 0.0  | -2.6 | -0.3 | -6.7 | 1.0 | 1.0  | 1.0  | 1.0  | 0.9  | -19.2        | 1.0        |
| 3  | Tropical E Pacific    | Tropical     | 0.0  | 0.0  | -0.5 | 0.0  | -1.3 | 0.9 | 1.0  | 0.0  | -0.4 | 0.3  | 3.1 (-3.3)   | 0.3 (0.4)  |
| 7  | Tropical W Atlantic   | Tropical     | 0.0  | 0.6  | 0.5  | -0.1 | -1.8 | 0.9 | 0.9  | 0.4  | 0.0  | -0.4 | 9.6          | 1.0        |
| 8  | Caribbean Sea         | Tropical     | -0.1 | 0.0  | -0.2 | 0.0  | -0.8 | 1.0 | 1.0  | -0.2 | -0.2 | -0.8 | 2.2          | 1.0        |
| 23 | Tropical E Atlantic   | Tropical     | -0.1 | 0.2  | -0.5 | 0.0  | -0.5 | 1.0 | 1.0  | 0.6  | 0.8  | -0.5 | 1.5          | 0.6        |
| 26 | Tropical W Indian     | Tropical     | 0.0  | 0.1  | 0.0  | 0.0  | -0.7 | 1.0 | 1.0  | -0.6 | 0.5  | 0.3  | 5.6          | 0.9        |
| 37 | N Australia           | Tropical     | 0.0  | 0.0  | 0.0  | 0.0  | -0.2 | 1.0 | 1.0  | 0.6  | 0.2  | 0.7  | 5.2          | 1.0        |
| 38 | SE Asia               | Tropical     | -0.2 | 0.1  | 0.0  | 0.0  | -1.0 | 1.0 | 1.0  | -0.2 | -0.3 | -0.1 | 8.9          | 0.2        |
| 6  | Brazilian Current     | WBC          | -0.1 | 0.0  | -0.5 | -0.1 | -0.9 | 1.0 | -0.2 | 0.8  | 0.7  | -0.4 | 7.5          | 0.9        |
| 10 | U.S. East Coast       | WBC          | -0.5 | 0.0  | 0.0  | 0.0  | -0.3 | 1.0 | 1.0  | 0.9  | 0.9  | 0.8  | 12.4 (5.7)   | 0.9 (0.9)  |
| 25 | Agulhas Current       | WBC          | 0.0  | 0.1  | -0.1 | 0.0  | -1.0 | 1.0 | 1.0  | 0.4  | 0.1  | 0.3  | 8.1          | 1.0        |
| 35 | E Australian Current  | WBC          | 0.2  | 0.0  | 0.1  | 0.0  | -0.3 | 1.0 | 0.6  | 1.0  | 0.9  | 0.6  | 7.4          | 1.0        |

45

|    |                        |     |      |     |      |     |      |     |     |     |     |     |               |           |
|----|------------------------|-----|------|-----|------|-----|------|-----|-----|-----|-----|-----|---------------|-----------|
| 39 | China Sea and Kuroshio | WBC | -0.2 | 0.0 | -0.6 | 0.0 | -1.3 | 1.0 | 0.9 | 1.0 | 0.9 | 0.9 | 13.2<br>(9.1) | 0.9 (0.4) |
|----|------------------------|-----|------|-----|------|-----|------|-----|-----|-----|-----|-----|---------------|-----------|
