# Supplementary material for: A framework to evaluate and elucidate the driving mechanisms of coastal sea surface p CO 2 seasonality using an ocean general circulation model (MOM6-COBALT)
Source: Copernicus journal article supplement (doi:10.5194/os-18-67-2022), 2022-01-10
Supplement: Supplementary file [file os-18-67-2022-supplement-title-page.pdf › os-18-67-2022-supplement-title-page.pdf]

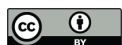

*Supplement of*

**A framework to evaluate and elucidate the driving mechanisms of coastal sea surface  $p\text{CO}_2$  seasonality using an ocean general circulation model (MOM6-COBALT)**

**Alizée Roobaert et al.**

*Correspondence to:* Alizée Roobaert ([alizée.roobaert@ulb.be](mailto:alizée.roobaert@ulb.be))

- [os-18-67-2022-supplement-title-page.pdf](#)
- [EGU\\_Roobaert\\_OS\\_matlab\\_script\\_Appendix.m](#)
- [EGU\\_Roobaert\\_OS\\_supporting\\_Information\\_Modified\\_revisedv4\\_2.pdf](#)

The copyright of individual parts of the supplement might differ from the article licence.
